# Supplementary material for: Enhanced Antitumor Immune Response in 2′-5′Oligoadenylate Synthetase-Like 1- (OASL1-) Deficient Mice upon Cisplatin Chemotherapy and Radiotherapy
Source: Hindawi journal article supplement (doi:10.1155/2019/7596786), 2019-03-31
Supplement: f1 [file 7596786.f1.pdf]

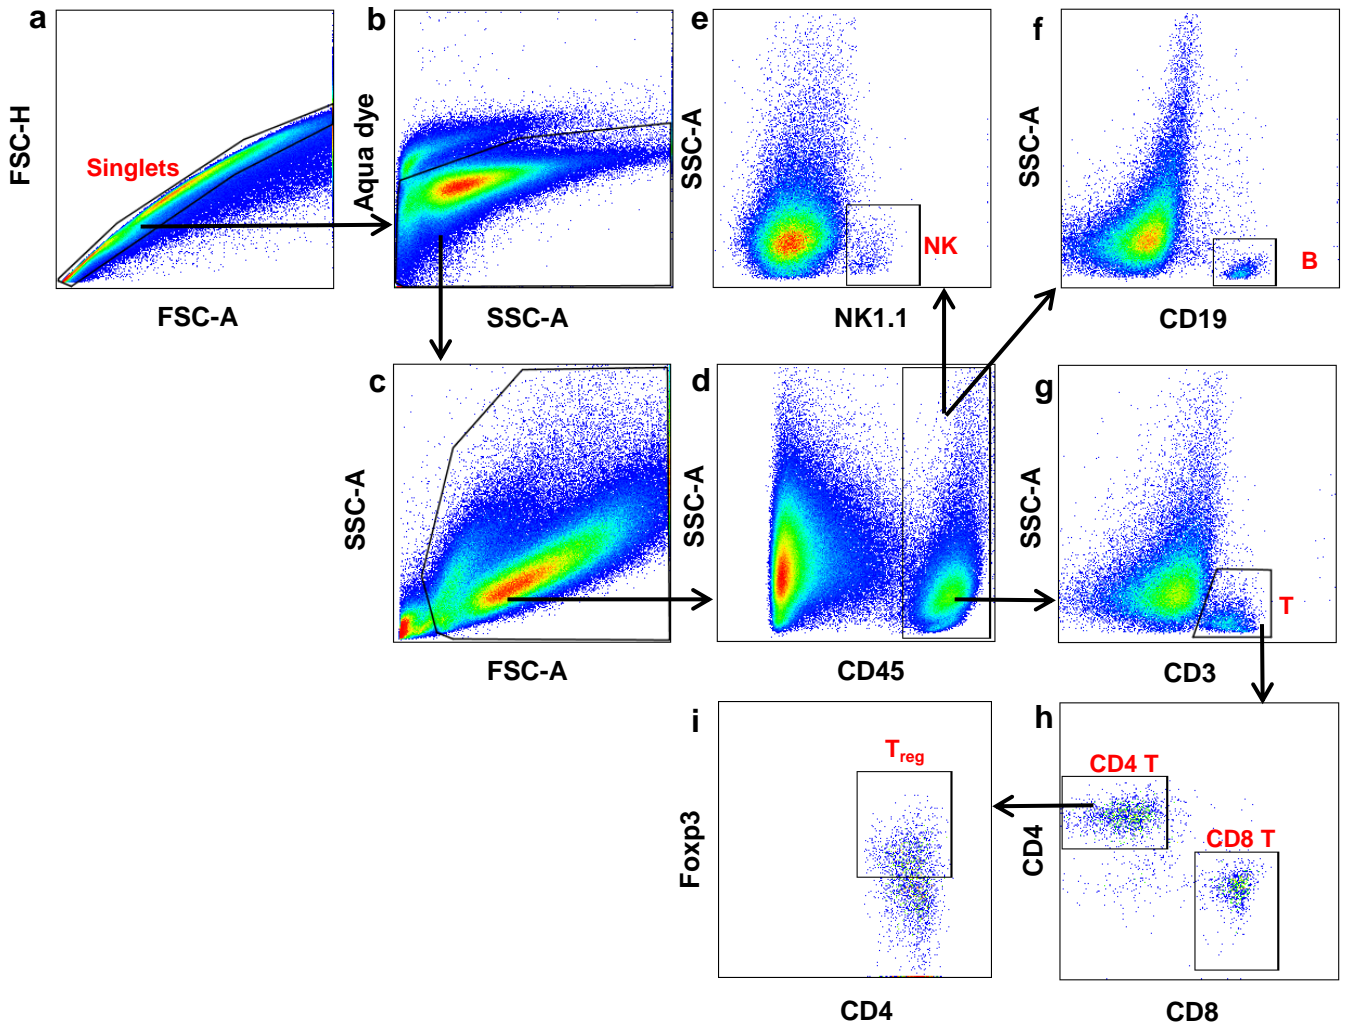

Supplementary Figure 1: Gating strategy used to identify major lymphocyte populations, NK, B, CD3<sup>+</sup> T, CD4<sup>+</sup> T, CD8<sup>+</sup> T, and T<sub>reg</sub> cells. Tumor-containing lung-derived single cells were stained with Aqua fluorescent reactive dye (dead cell staining) together with either fluorophore-labeled anti-CD45, CD3, CD4, CD8, CD19, and NK1.1 antibodies (Abs) or fluorophore-labeled anti-CD45, CD3, CD4, CD8, CD19, and Fcpx3 Abs to identify various cell subsets. (a) Doublets deviating from the diagonal in the plot of forward scatter area (FSC-A) versus forward scatter height (FSC-H) were excluded. (b) Following, dead cells were excluded by their staining with Aqua fluorescent reactive dye. (c) Live cells, which were higher up on the FSC-A and side scatter area (SSC-A) profile, were further selected. (d) CD45<sup>+</sup> hematopoietic cells were then selected. (e) Subsequently, NK cells (NK1.1<sup>+</sup>SSC-A<sup>low</sup>) and (f) B cells (CD19<sup>+</sup>SSC-A<sup>low</sup>) were identified. (g) T cells (CD3<sup>+</sup>SSC<sup>low</sup>) were identified and gated. (h) CD4<sup>+</sup> T cells (CD3<sup>+</sup>CD4<sup>+</sup>CD8<sup>-</sup>) and CD8<sup>+</sup> T cells (CD3<sup>+</sup>CD4<sup>-</sup>CD8<sup>+</sup>) were identified and (i) T<sub>reg</sub> (CD3<sup>+</sup>CD4<sup>+</sup>CD8<sup>-</sup>Fcpx3<sup>+</sup>) were identified among CD4<sup>+</sup> T cells. Isotype-matched controls for all Abs were used to determine positive populations. Identified populations are marked in red text.

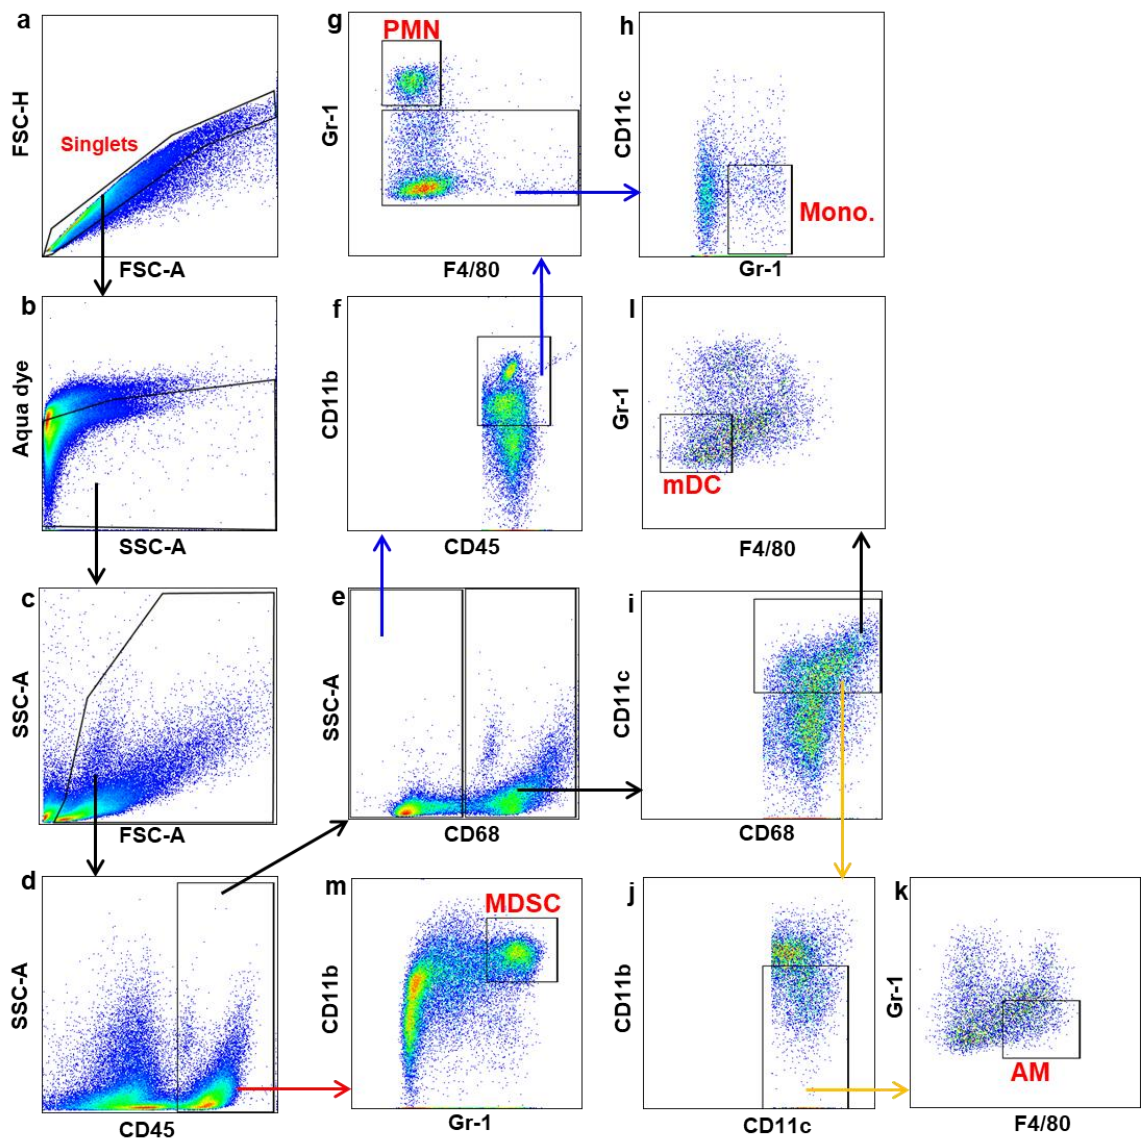

Supplementary Figure 2: Gating strategy used to identify major pulmonary myeloid populations PMN, Monocyte (Mono), AM, mDC, and MDSC from tumor-containing mouse lung tissues. This strategy is based on the report by Rinat Zaynagetdinov group at Vanderbilt University (26). Lung-derived single cells were stained with fluorophore-labeled anti-CD45, CD68, CD11b, F4/80, CD11c, and Gr-1 Abs together with Aqua fluorescent reactive dye (dead cell staining). (a) Doublets deviating from the diagonal in the plot of FSC-A versus FSC-H were excluded. (b) Viable Aqua dye-negative cells were then selected, and (c) live cells with higher FSC/SSC profile were further selected. (d) CD45<sup>+</sup> cells were selected, and (e) CD68<sup>hi</sup> and CD68<sup>low</sup> cells were separately gated. (f) CD68<sup>low</sup>CD11b<sup>+</sup> cells were selected. (g) PMN (Polymorphonuclear cell, CD68<sup>low</sup>CD11b<sup>+</sup>F4/80<sup>+</sup>Gr-1<sup>hi</sup>) was identified, and CD68<sup>low</sup>CD11b<sup>+</sup>Gr-1<sup>low</sup> cells were gated. (h) Monocyte (Mono, CD68<sup>low</sup>CD11b<sup>+</sup>Gr-1<sup>low</sup>CD11c<sup>-</sup>) were identified. (i) CD68<sup>hi</sup>CD11c<sup>+</sup> cells were gated, and (j) CD68<sup>hi</sup>CD11c<sup>+</sup>CD11b<sup>-</sup> cells were selected. (k) AM (Alveolar macrophage, CD68<sup>hi</sup>CD11c<sup>+</sup>CD11b<sup>-</sup>F4/80<sup>+</sup>Gr-1<sup>-</sup>) were identified. (l) mDC (CD68<sup>hi</sup>CD11c<sup>+</sup>F4/80<sup>+</sup>Gr-1<sup>-</sup>) were identified, and (m) broadly defined MDSC cells (CD11b<sup>+</sup>Gr-1<sup>+</sup>) were identified. Isotype-matched controls for all Abs were used to determine positive populations. Identified populations are marked in red text.
